# Supplementary material for: Self-assembly of an in silico designed dipeptide derivative to obtain photo-responsive vesicles
Source: Royal Society of Chemistry journal article supplement (doi:10.1039/d2cp03258a), 2022-01-01
Supplement: d2cp03258a2.pdf [file d2cp03258a2.pdf]

*Electronic Supplementary Information*

Self-assembly of an *in silico* designed dipeptide derivative to obtain photo-responsive vesicles

Jun Zhang,<sup>a</sup> Yining Wang,<sup>a</sup> Junfeng Wang,<sup>a</sup> Youguo Yan,<sup>a</sup> Jiawei Li,<sup>\*b</sup> and Zhen Li <sup>\*a</sup>

<sup>a</sup>. School of Materials Science and Engineering, China University of Petroleum (East China),  
Qingdao 266580, China. E-mail: zhenli@upc.edu.cn

<sup>b</sup>. Key Laboratory of Marine Environmental Corrosion and Bio-Fouling, Institute of Oceanology,  
Chinese Academy of Sciences, Qingdao 266071, China. E-mail: xiicarson@gmail.com

**Table S1.** Parameters of Lennard-Jones potential <sup>[1,2]</sup> for coarse-grained bead types used in this work

| Bead type       | Q <sub>d</sub><br>(for N-terminal main-chain) | Q <sub>a</sub><br>(for C-terminal main-chain) | N <sub>0</sub><br>(for azo)                   | SC <sub>4</sub><br>(for benzene ring)           | P <sub>4</sub><br>(for water)                 |
|-----------------|-----------------------------------------------|-----------------------------------------------|-----------------------------------------------|-------------------------------------------------|-----------------------------------------------|
| Q <sub>d</sub>  | $\epsilon = 5.0$ kJ/mol<br>$\sigma = 0.47$ nm |                                               |                                               |                                                 |                                               |
| Q <sub>a</sub>  | $\epsilon = 5.6$ kJ/mol<br>$\sigma = 0.47$ nm | $\epsilon = 5.0$ kJ/mol<br>$\sigma = 0.47$ nm |                                               |                                                 |                                               |
| N <sub>0</sub>  | $\epsilon = 3.5$ kJ/mol<br>$\sigma = 0.47$ nm | $\epsilon = 3.5$ kJ/mol<br>$\sigma = 0.47$ nm | $\epsilon = 3.5$ kJ/mol<br>$\sigma = 0.47$ nm |                                                 |                                               |
| SC <sub>4</sub> | $\epsilon = 2.7$ kJ/mol<br>$\sigma = 0.47$ nm | $\epsilon = 2.7$ kJ/mol<br>$\sigma = 0.47$ nm | $\epsilon = 3.5$ kJ/mol<br>$\sigma = 0.47$ nm | $\epsilon = 2.625$ kJ/mol<br>$\sigma = 0.43$ nm |                                               |
| P <sub>4</sub>  | $\epsilon = 5.6$ kJ/mol<br>$\sigma = 0.47$ nm | $\epsilon = 5.6$ kJ/mol<br>$\sigma = 0.47$ nm | $\epsilon = 3.5$ kJ/mol<br>$\sigma = 0.47$ nm | $\epsilon = 2.7$ kJ/mol<br>$\sigma = 0.47$ nm   | $\epsilon = 5.0$ kJ/mol<br>$\sigma = 0.47$ nm |

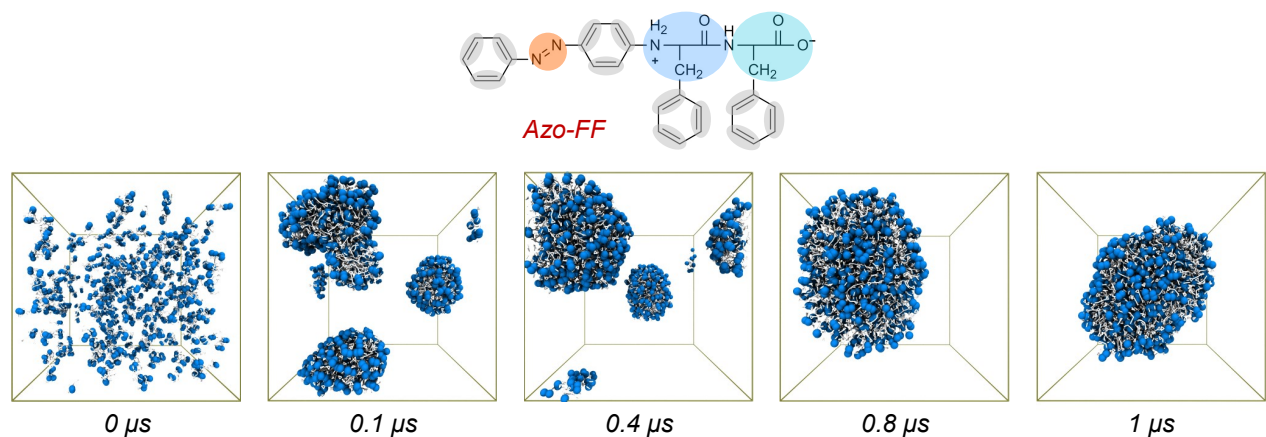

**Figure S1.** Self-assembly process of Azo-FF molecules. Initially, Azo-FF molecules were randomly distributed in water. As the simulation goes on, Azo-FF molecules quickly aggregate into solid spheres. Also, the core of the spheres is the mixture of hydrophobic groups and hydrophilic groups, indicating that they cannot be separated in space due to the disordered molecule structure. Hydrophilic groups are rendered using blue spheres, and hydrophobic parts are shown in white lines.

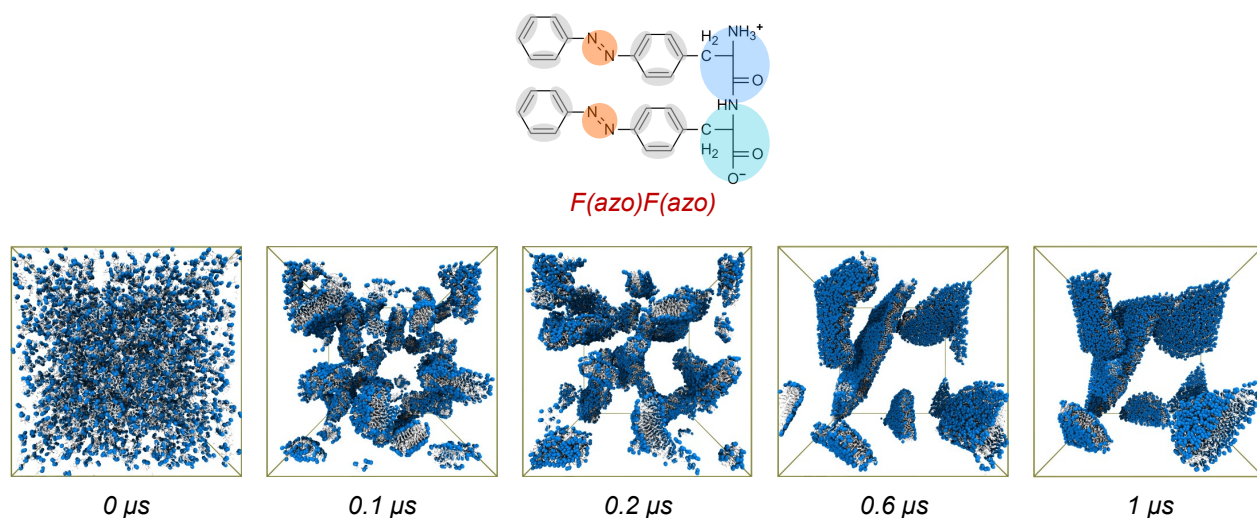

**Figure S2.** Self-assembly process of F(azo)F(azo) molecules. Randomly distributed F(azo)F(azo) molecules quickly aggregate into small disks and spheres. Then, they further fuse into large lamellae. These lamellae are very flat, indicating extremely high bending rigidity. Hydrophilic groups are rendered using blue spheres, and hydrophobic parts are shown in white lines.

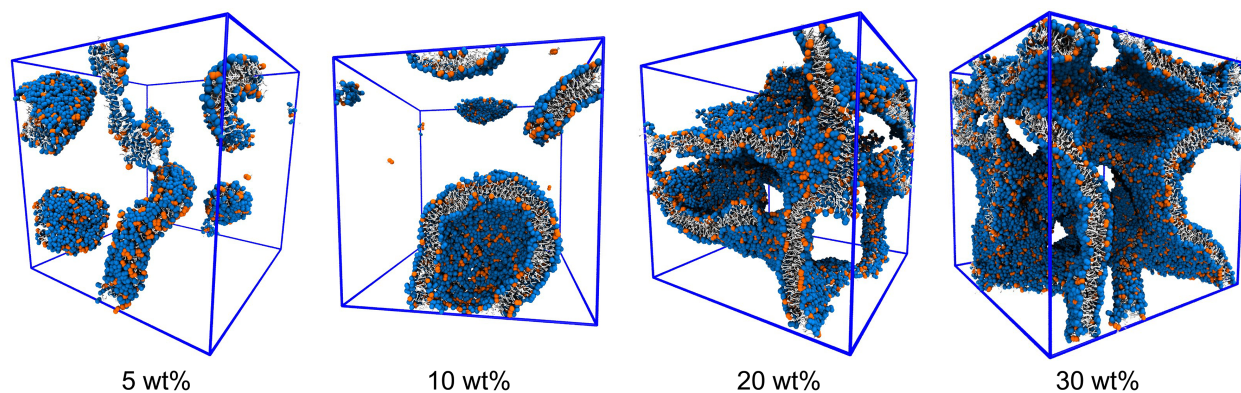

**Figure S3.** Effect of concentration of peptides on the self-assembly morphology. Taking the F(azo)A:FF=4:1 system for example, peptides form into vesicles at the concentration of 10 wt %. As the concentration decreases, number of peptide molecules is limited to form large assemblies. What we observe at the concentration of 5 wt % are small spheres, disks, and rods. When the concentration is larger (we tested 20 wt % and 30 wt %), peptides assemble into the bicontinuous phase. Taken together, as the concentration increases, the self-assembly morphology transforms from dispersed small flakes into vesicles and bicontinuous phases. The concentration of 10 wt % is an appropriate content to obtain vesicles.

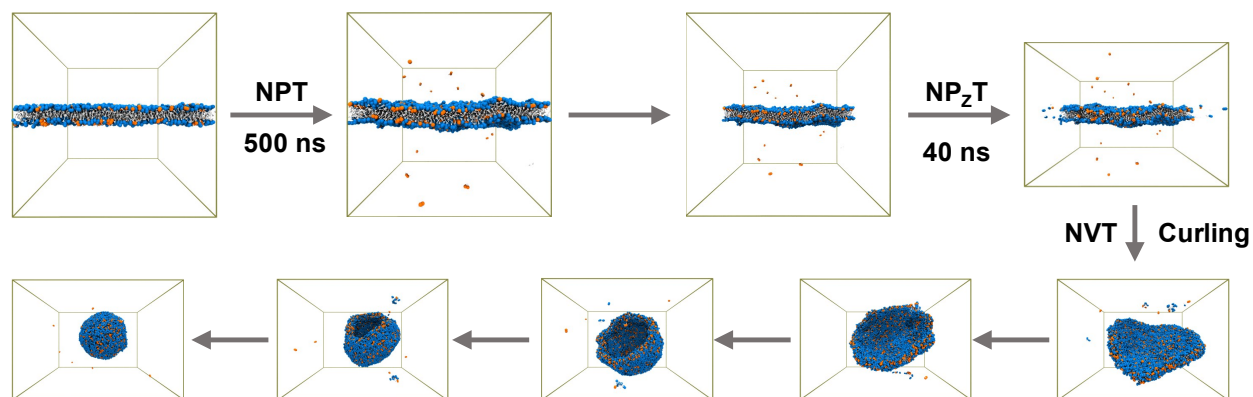

**Figure S4.** The procedure to construct vesicle models with uniform sizes and balanced numbers of molecules in the inner and outer leaflets. First, a bilayer structure of F(azo)A and FF was constructed and simulated for 500 ns to reach equilibrium. Then, the equilibrated bilayer was placed in a larger water box. The x and y dimension of the water box was fixed, and the box along the z direction was relaxed with 40 ns NP<sub>z</sub>T simulation. Finally, a NVT simulation was performed, and the bilayer spontaneously curls into a spherical vesicle. This procedure was used in our previous work to generate a phospholipid liposome model.<sup>[3]</sup>

## REFERENCES

- [1] Marrink, S. J.; Risselada, H. J.; Yefimov, S.; Tieleman, D. P.; de Vries, A. H., The MARTINI Force Field: Coarse Grained Model for Biomolecular Simulations. *J. Phys. Chem. B* 2007, 111 (27): 7812-7824.
- [2] Monticelli, L.; Kandasamy, S. K.; Periole, X.; Larson, R. G.; Tieleman, D. P.; Marrink, S.-J., The MARTINI Coarse-Grained Force Field: Extension to Proteins. *J. Chem. Theory Comput.* 2008, 4 (5): 819-834.
- [3] Li, Z.; Zhang, Y.; Ma, J.; Meng, Q.; Fan, J., Modeling Interactions between Liposomes and Hydrophobic Nanosheets. *Small* 2019, 15(6): 1804992.
